# Supplementary material for: Genome-Wide Association Study of Major Recurrent Depression in the U.K. Population
Source: Atypon-hosted journal article supplement (doi:10.1176/appi.ajp.2010.09091380), 2010-06-02
Supplement: ajp_167_08_949_01.pdf [file ajp_167_08_949_01.pdf]

## 1. Extended description of Quality Control methods and results

### *Genotyping Workflow*

Concentration, fragmentation and response to PCR were determined. The concentrations of all samples were adjusted to 50 ng/μl and 15 μl of each sample robotically dispensed into barcoded 96-well plates. Samples from cases and controls were randomly distributed on plates. The plates were processed in a fully automated Illumina BeadLab equipped with liquid handling robots (Tecan Ltd, Dorset, UK), Illumina BeadArray readers and Illumina iScans (Illumina Ltd, CA, USA). Genotyping was carried out using the Illumina HumanHap610 quad array according to manufacturer's recommendations. The raw data were analyzed using Beadstudio (Illumina Ltd, CA, USA) and extracted for statistical analysis.

Confirmatory genotyping of SNPs showing suggestive evidence of association was performed to confirm the calling of alleles and to provide verification of the genotypes for imputed SNPs and was carried out at the MRC SGDP Centre using a Biomek FX liquid handling robot and a Equator Low Volume Pipetting System (Deerac Fluidics), PCR with predesigned Taqman® SNP assays was performed on MJ research 384 PCR machines and genotypes were called on an ABI 7900 with SDS v2.0 (PE Applied Biosystems, Foster City, CA, USA).

### *Quality control*

Quality control procedures were performed using PLINK v1.04 (Purcell et al. 2007) using stringent thresholds of completeness, minor allele frequency (MAF) and Hardy-Weinberg equilibrium separately in case and control data sets, to ensure high quality results.

An initial analysis of individual-level data excluded samples with genotyping completeness of less 95% or outlier values of heterozygosity ( $<0.29$  or  $>0.36$ ), where gender assigned from genotypic data was inconclusive or inconsistent with phenotypic information (in cases only). Non-European ancestry was determined using EIGENSTRAT (see below). Related or duplicate individuals within and across case and control samples were identified through identity-by-state sharing analysis on an linkage disequilibrium-pruned set of SNPs (~ 18K SNPs); for each pair related up to second degree relationships, the individual with lower genotyping completeness was omitted.

To optimize data quality, all SNP QC thresholds were applied separately to cases and controls, then merged data sets were formed for analysis. SNP genotyping completeness was higher in cases than in controls, due primarily to DNA from 1289 controls (73.7%) being collected from cheek swabs. To ensure non-differential missing rates in cases and controls, genotyping completeness thresholds were applied separately in each group. SNPs with call rate  $< 99\%$ ; Hardy-Weinberg equilibrium P-values  $< 10^{-5}$  in cases or

controls, and minor allele frequency  $< 1\%$  were removed. Finally, based on this set of high-quality SNPs, samples that had genotyping completeness  $< 99\%$  were excluded.

Supplementary Table 1 shows the breakdown of SNP and sample filtering during the quality control procedures of the depression cases and controls. Analyses were performed using the PLINK v 1.04 and 1.05.

### **EIGENSTRAT analysis**

All samples were tested for population stratification using the software EIGENSTRAT (Price et al. 2006), which performs a principal components analysis (PCA) on SNP data, in a two stage process. Analysis was performed on a subset of 80,304 SNPs selected from all genotyped SNPs, omitting regions of high LD.

Individuals of non-European ancestry were identified by combining study genotypes with genotypes from HapMap data from the CEU, YRI, CBT, JPT and GIH populations (with GIH included since much of non-European ancestry in the UK is from the Indian sub-continent). In total, 9 cases and 12 controls were omitted (Supplementary Figure 1). The UK-ascertained cases provided a good match to control samples, and two principal components were necessary to correct for differences between cases and controls.

Further analysis was performed on the cleaned data set with SNPs and individuals identified above omitted. Principal component loadings differed between cases and controls on the first two principal components, and these were therefore included as covariates in testing for association.

**Supplementary Table 1;** Breakdown of SNP and sample filtering during the quality control procedures of the depression case and control data. Association analysis is based on 471,747 SNPs that passed QC in both cohorts.

|                                    | <b>Cases</b> |                    | <b>Controls</b> |                    |
|------------------------------------|--------------|--------------------|-----------------|--------------------|
|                                    | <b>SNPs</b>  | <b>Individuals</b> | <b>SNPs</b>     | <b>Individuals</b> |
| No. before QC                      | 582,574      | 1755               | 582,574         | 1,745              |
| No. dropped at QC step:            |              |                    |                 |                    |
| 1. Genotyping completeness < 99%   | -            | 59                 | -               | 117                |
| 2. Extreme heterozygosity          | -            | 3                  | -               | 6                  |
| 3. Non-European ancestry           | -            | 9                  | -               | 12                 |
| 4. Inconsistent genotype sex       | -            | 16                 | -               | 4                  |
| 5. Close relatives, duplicates     | -            | 32                 | -               | 12                 |
| 6. Call rate < 99%                 | 18,527       | -                  | 82,875          | -                  |
| 7. Minor allele frequency < 0.01   | 31,136       | -                  | 25,827          | -                  |
| 8. HWE P-values < 10 <sup>-5</sup> | 546          | -                  | 364             | -                  |
| No. remaining after QC             | 532,365      | 1,636              | 473,508         | 1,594              |

**Supplementary Figure 1:**

HapMap CEU, YRI, CHB, JPT and GIH populations with cases and controls, to identify individuals study subjects of non-European origin

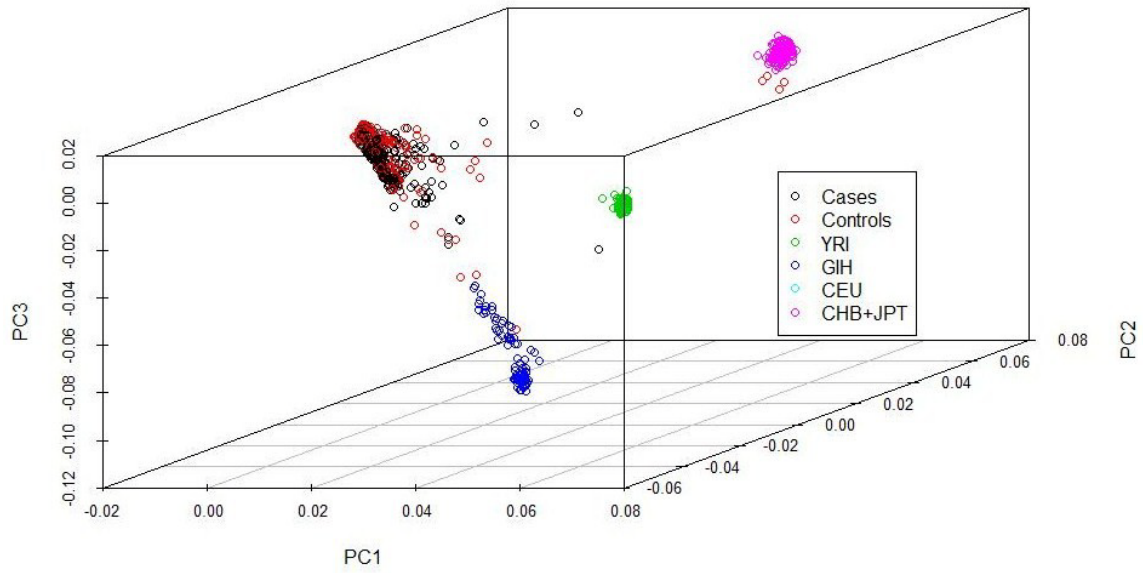

**Supplementary Figure 2: Individual loadings on principal components 1 and 2 (PC1, PC2) for EIGENSTRAT analysis for depression cases v. controls**

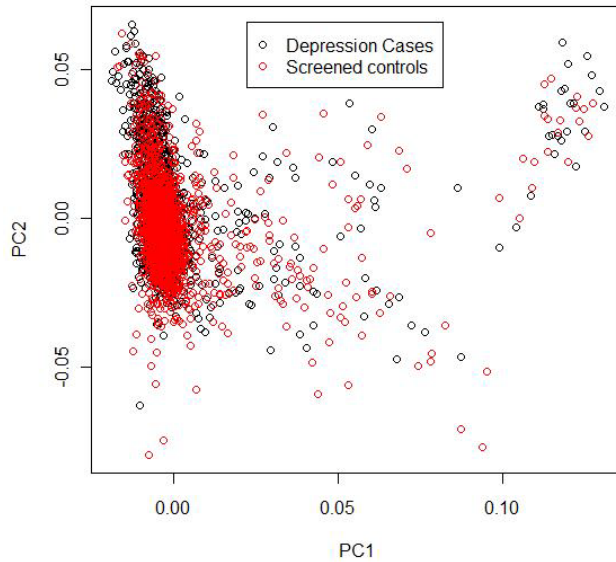

**Association testing**

The primary analysis was logistic regression for case control status on SNP genotypes, under an additive model for genotype (i.e. coded 0, 1, 2), with covariates comprising the eigenvector loadings for two principal components. Additional analysis was performed using logistic regression under a dominant and recessive inheritance models, and using a full genotypic model.

**Supplementary Figure 3:** Quantile-quantile plot of observed  $-\log_{10}(\text{p-values})$  for 471,474 SNPs, analysed with logistic regression under an additive genetic model, with two ancestry principal components as covariates. Genomic control  $\lambda=1.02$ .

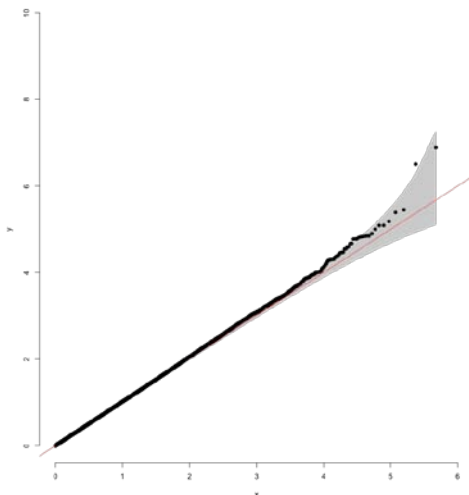

**Supplementary Figure 4:** Manhattan plot of genomic location against  $-\log_{10}(\text{p-value})$  from logistic regression test statistic, showing 4 SNPs (on chromosomes 2, 10 and 16) exceeding the threshold shown for suggestive significance ( $p=5 \times 10^{-6}$ ) but no SNPs reaching genome-wide significance ( $p=5 \times 10^{-8}$ ).

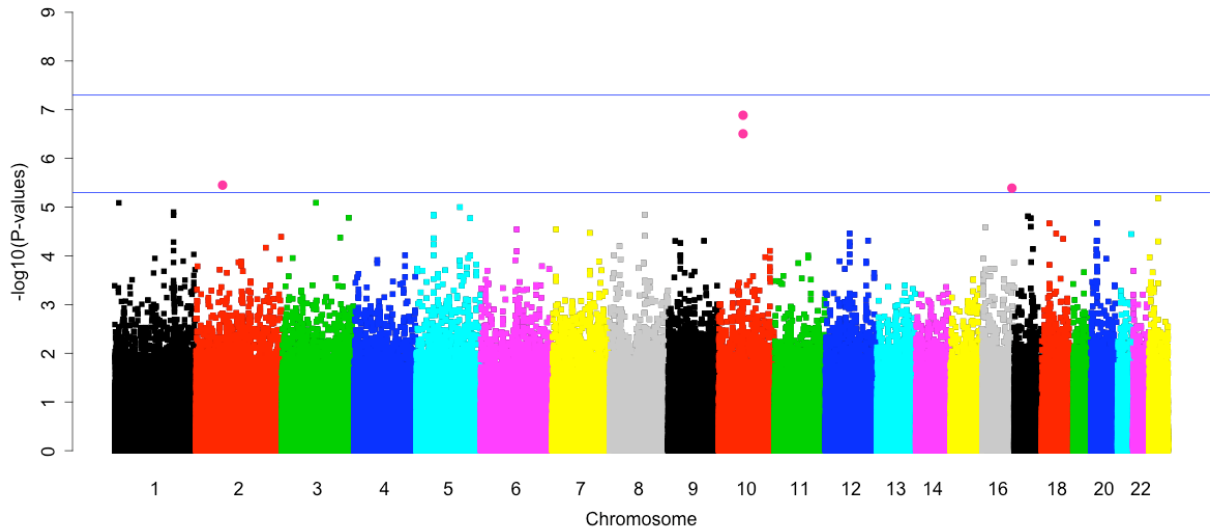

## References

- Price, A.L., Patterson, N.J., Plenge, R.M., Weinblatt, M.E., Shadick, N.A., and Reich, D. 2006. Principal components analysis corrects for stratification in genome-wide association studies. *Nat Genet* 38: 904-909.
- Purcell, S., Cherny, S.S., and Sham, P.C. 2003. Genetic Power Calculator: design of linkage and association genetic mapping studies of complex traits. *Bioinformatics* 19: 149-150.
- Purcell, S., Neale, B., Todd-Brown, K., Thomas, L., Ferreira, M.A., Bender, D., Maller, J., Sklar, P., de Bakker, P.I., Daly, M.J. et al. 2007. PLINK: a tool set for whole-genome association and population-based linkage analyses. *Am J Hum Genet* 81: 559-575.

**Supplementary Table 2:** Analysis of SNPs in candidate genes for association with depression (2654 SNPs in 84 genes). The SNP achieving the minimum p-value in each gene is shown, with genes ordered by Bonferroni-corrected p-values for each gene.

| Candidate Gene | Chr. | SNP        | Position (base pairs) | Alleles in gene | No. SNPs | P-value   | Odds Ratio | Frequency in Cases Controls |      |
|----------------|------|------------|-----------------------|-----------------|----------|-----------|------------|-----------------------------|------|
| PDE9A          | 21   | rs13050655 | 43045971              | A/G             | 53       | 3.58E-05  | 0.60       | 0.03                        | 0.06 |
| SLC6A1         | 3    | rs2697153  | 10998672              | G/A             | 42       | 0.0002623 | 0.83       | 0.37                        | 0.41 |
| NR3C1          | 5    | rs10482682 | 142659590             | T/C             | 20       | 0.001022  | 1.19       | 0.40                        | 0.36 |
| TBX21          | 17   | rs11650354 | 43177091              | T/C             | 5        | 0.007115  | 1.19       | 0.19                        | 0.16 |
| DRD5           | 4    | rs1878943  | 9375986               | T/C             | 4        | 0.01851   | 1.16       | 0.20                        | 0.17 |
| FGFR3          | 4    | rs743682   | 1767650               | A/G             | 2        | 0.04806   | 0.84       | 0.08                        | 0.09 |
| HTR2C          | 23   | rs2428700  | 113916920             | A/G             | 11       | 0.008948  | 0.82       | 0.15                        | 0.18 |
| HTR4           | 5    | rs17108435 | 147933440             | C/T             | 38       | 0.002617  | 0.80       | 0.12                        | 0.15 |
| AVPR1A         | 12   | rs7308008  | 61844229              | A/G             | 9        | 0.0118    | 0.84       | 0.14                        | 0.16 |
| SLC6A2         | 16   | rs3785152  | 54274051              | T/C             | 36       | 0.003313  | 1.28       | 0.12                        | 0.09 |
| AVPR1B         | 1    | rs28419084 | 204413276             | T/C             | 10       | 0.01521   | 1.24       | 0.10                        | 0.09 |
| CACNA1C        | 12   | rs7960297  | 2416780               | T/C             | 173      | 0.0009678 | 0.74       | 0.08                        | 0.10 |
| GSK3B          | 3    | rs16830594 | 121088768             | G/A             | 23       | 0.007536  | 0.81       | 0.11                        | 0.13 |
| FGFR1          | 8    | rs13279569 | 38460773              | A/G             | 12       | 0.01877   | 0.80       | 0.07                        | 0.08 |
| GRIN1          | 9    | rs10870198 | 139162141             | G/A             | 3        | 0.08201   | 0.91       | 0.38                        | 0.41 |
| SLC6A4         | 17   | rs1487971  | 25596879              | T/C             | 13       | 0.02009   | 0.89       | 0.37                        | 0.40 |
| GRIN3A         | 9    | rs1983812  | 103372864             | T/C             | 53       | 0.004983  | 0.87       | 0.48                        | 0.51 |
| PDE11A         | 2    | rs9288008  | 178254180             | C/T             | 96       | 0.003993  | 0.76       | 0.06                        | 0.09 |
| PSMD9          | 12   | rs895959   | 120804735             | C/T             | 5        | 0.08273   | 1.14       | 0.13                        | 0.12 |
| ZNF804A        | 2    | rs1583048  | 185491386             | C/T             | 30       | 0.01382   | 0.85       | 0.19                        | 0.21 |
| GRIN2D         | 19   | rs1799286  | 53624149              | T/C             | 8        | 0.05202   | 0.78       | 0.04                        | 0.05 |
| GRIK2          | 6    | rs609531   | 102161603             | C/A             | 134      | 0.003194  | 1.18       | 0.31                        | 0.28 |
| GRIK1          | 21   | rs466612   | 30186260              | T/G             | 109      | 0.00415   | 1.45       | 0.05                        | 0.03 |
| GRIN2A         | 16   | rs17571080 | 10199561              | A/G             | 137      | 0.003359  | 1.22       | 0.18                        | 0.15 |
| PDE1A          | 2    | rs1430153  | 183109918             | C/T             | 69       | 0.006749  | 1.17       | 0.26                        | 0.24 |
| HTR7           | 10   | rs7916720  | 92616547              | C/T             | 20       | 0.02339   | 0.86       | 0.19                        | 0.21 |
| LEP            | 7    | rs791608   | 127660228             | T/C             | 10       | 0.04766   | 1.22       | 0.07                        | 0.06 |
| TPH1           | 11   | rs172424   | 17979526              | G/T             | 4        | 0.1207    | 0.92       | 0.44                        | 0.46 |
| GRIK4          | 11   | rs1944522  | 120370132             | T/C             | 99       | 0.005053  | 1.15       | 0.51                        | 0.48 |
| HTR2A          | 13   | rs1328674  | 46339708              | T/C             | 46       | 0.01099   | 0.73       | 0.04                        | 0.05 |
| DRD2           | 11   | rs4274224  | 112824662             | G/A             | 26       | 0.02111   | 0.89       | 0.47                        | 0.50 |
| MAOA           | 23   | rs1137070  | 43488335              | T/C             | 9        | 0.06552   | 1.12       | 0.30                        | 0.28 |
| PER2           | 2    | rs7582286  | 238880426             | C/A             | 10       | 0.06014   | 0.90       | 0.31                        | 0.33 |
| GSK3A          | 19   | rs11878620 | 47439069              | A/G             | 1        | 0.618     | 1.05       | 0.07                        | 0.07 |
| FGFR4          | 5    | rs451643   | 176444038             | T/G             | 4        | 0.1616    | 0.92       | 0.29                        | 0.31 |
| GRIN2C         | 17   | rs1568447  | 70348607              | C/T             | 5        | 0.1307    | 1.08       | 0.37                        | 0.35 |
| LEPR           | 1    | rs6588147  | 65708082              | G/A             | 40       | 0.01686   | 0.88       | 0.33                        | 0.35 |
| GRIA3          | 23   | rs5911634  | 122461630             | A/C             | 45       | 0.01499   | 1.16       | 0.30                        | 0.26 |
| OLIG1          | 21   | rs2834078  | 33345769              | G/T             | 6        | 0.1183    | 0.83       | 0.04                        | 0.05 |
| ADRA2C         | 4    | rs6822427  | 3749870               | T/C             | 4        | 0.1845    | 0.94       | 0.48                        | 0.50 |

|        |               |               |     |         |      |      |      |
|--------|---------------|---------------|-----|---------|------|------|------|
| AKT1   | 14 rs2498804  | 104304140 A/C | 1   | 0.7907  | 0.99 | 0.31 | 0.31 |
| BDNF   | 11 rs908867   | 27702340 T/C  | 14  | 0.06222 | 0.85 | 0.09 | 0.10 |
| DRD4   | 11 rs4963126  | 646845 A/G    | 3   | 0.3119  | 0.95 | 0.44 | 0.45 |
| PSMB4  | 1 rs4603      | 149640649 C/T | 5   | 0.1965  | 1.09 | 0.18 | 0.17 |
| PER1   | 17 rs2304911  | 7991704 G/A   | 5   | 0.2044  | 0.86 | 0.04 | 0.05 |
| SLC6A3 | 5 rs2292023   | 1514389 A/C   | 23  | 0.04633 | 0.86 | 0.12 | 0.13 |
| CRHR1  | 17 rs17763104 | 41261576 A/G  | 15  | 0.0769  | 0.87 | 0.12 | 0.14 |
| GRIK5  | 19 rs8099939  | 47212948 T/G  | 5   | 0.2369  | 1.06 | 0.44 | 0.42 |
| ABCB1  | 7 rs9282564   | 87067376 C/T  | 56  | 0.02335 | 0.83 | 0.10 | 0.11 |
| PER3   | 1 rs10462018  | 7802214 T/C   | 17  | 0.07858 | 1.13 | 0.17 | 0.15 |
| IL6    | 7 rs2069837   | 22734552 G/A  | 17  | 0.08029 | 1.19 | 0.08 | 0.07 |
| ADRA1B | 5 rs17455628  | 159281476 G/T | 19  | 0.07303 | 1.21 | 0.06 | 0.05 |
| OLIG2  | 21 rs762236   | 33301494 A/G  | 11  | 0.1301  | 0.93 | 0.47 | 0.49 |
| CD3E   | 11 rs12576947 | 117663265 C/T | 5   | 0.2869  | 0.94 | 0.32 | 0.34 |
| HTR1A  | 5 rs1364043   | 63286607 G/T  | 2   | 0.7879  | 1.02 | 0.24 | 0.24 |
| GRIA4  | 11 rs597395   | 105226679 A/G | 48  | 0.03455 | 0.78 | 0.04 | 0.05 |
| GNB3   | 12 rs4963511  | 6813631 A/G   | 13  | 0.1288  | 1.11 | 0.16 | 0.14 |
| ANK3   | 10 rs2393596  | 61513573 A/C  | 114 | 0.015   | 1.17 | 0.20 | 0.18 |
| HTR2B  | 2 rs17586405  | 231687502 G/A | 2   | 0.8881  | 1.02 | 0.03 | 0.03 |
| HTR1B  | 6 rs2000292   | 78223664 A/G  | 13  | 0.1396  | 0.92 | 0.25 | 0.26 |
| HTR3B  | 11 rs2011249  | 113273848 A/G | 13  | 0.1424  | 1.10 | 0.20 | 0.18 |
| STAT3  | 17 rs9252     | 37808375 A/G  | 10  | 0.1967  | 0.89 | 0.08 | 0.09 |
| PCLO   | 7 rs7807790   | 82621782 C/T  | 68  | 0.0293  | 1.13 | 0.29 | 0.26 |
| NTRK2  | 9 rs7875184   | 86690918 T/C  | 74  | 0.02723 | 0.85 | 0.12 | 0.14 |
| CREB1  | 2 rs2709373   | 208094269 C/T | 7   | 0.2989  | 1.07 | 0.19 | 0.18 |
| HTR5A  | 7 rs2919435   | 154489085 A/G | 17  | 0.1256  | 0.93 | 0.39 | 0.41 |
| HTR3A  | 11 rs11214800 | 113368140 C/A | 19  | 0.1233  | 0.93 | 0.47 | 0.49 |
| OLIG3  | 6 rs13200244  | 137867324 T/G | 14  | 0.1743  | 0.92 | 0.22 | 0.23 |
| TPH2   | 12 rs12231341 | 70695703 T/C  | 30  | 0.08216 | 0.81 | 0.04 | 0.05 |
| COMT   | 22 rs737866   | 18310109 C/T  | 22  | 0.1159  | 1.10 | 0.29 | 0.27 |
| FKBP5  | 6 rs9380529   | 35783674 G/A  | 18  | 0.1647  | 0.93 | 0.48 | 0.50 |
| PRKCH  | 14 rs959729   | 61003953 T/C  | 74  | 0.0421  | 0.80 | 0.06 | 0.07 |
| GRIA2  | 4 rs4691394   | 158468483 A/G | 5   | 0.6575  | 0.97 | 0.14 | 0.14 |
| P2RX7  | 12 rs10849851 | 120081027 G/A | 23  | 0.1595  | 1.20 | 0.05 | 0.04 |
| DRD1   | 5 rs265995    | 174782552 T/C | 18  | 0.2053  | 0.91 | 0.13 | 0.14 |
| DRD3   | 3 rs11706283  | 115367825 T/C | 22  | 0.1834  | 1.12 | 0.10 | 0.09 |
| ADRA2B | 2 rs4426564   | 96144713 C/T  | 5   | 0.8428  | 1.01 | 0.33 | 0.33 |
| ADRA1A | 8 rs4236679   | 26682474 A/G  | 64  | 0.07791 | 0.83 | 0.05 | 0.06 |
| ADRA2A | 10 rs11195419 | 112829358 A/C | 10  | 0.5259  | 0.95 | 0.12 | 0.12 |
| CLOCK  | 4 rs3792603   | 55996815 G/A  | 10  | 0.5303  | 0.96 | 0.20 | 0.20 |
| GRIA1  | 5 rs11741924  | 153103056 A/G | 91  | 0.0656  | 0.91 | 0.32 | 0.35 |
| GRIN2B | 12 rs7970177  | 13630255 T/C  | 164 | 0.03872 | 1.20 | 0.09 | 0.08 |
| GRIK3  | 1 rs1027599   | 37164007 G/A  | 29  | 0.2482  | 0.90 | 0.09 | 0.10 |
| FGFR2  | 10 rs3135761  | 123266081 A/G | 35  | 0.2361  | 1.08 | 0.17 | 0.16 |



**Supplementary Table 3:** Association analysis of UK depression males cases (n=477) against all controls (n=1594), using logistic regression with two covariates of ancestry principal components. Genomic control  $\lambda=1.02$

| Chr. | SNP        | Position in base pairs | Alleles | P-value  | Odds Ratio | Frequency in |                   | Closest gene     |
|------|------------|------------------------|---------|----------|------------|--------------|-------------------|------------------|
|      |            |                        |         |          |            | Cases        | Screened controls |                  |
| 8    | rs6989226  | 15710484               | C/G     | 1.81E-06 | 1.6        | 0.1897       | 0.129             | <i>TUSC3</i>     |
| 17   | rs16957797 | 8839862                | G/T     | 6.70E-06 | 0.5771     | 0.09644      | 0.1518            | <i>LOC728685</i> |
| 14   | rs4982207  | 20102464               | T/C     | 8.21E-06 | 1.418      | 0.4653       | 0.3858            | <i>RNASE9</i>    |
| 5    | rs253890   | 116246177              | C/T     | 8.57E-06 | 1.799      | 0.1038       | 0.06152           | <i>SEMA6A</i>    |
| 12   | rs7306356  | 124342083              | T/C     | 1.07E-05 | 0.6874     | 0.2379       | 0.3128            | <i>TMEM132B</i>  |
| 2    | rs12471464 | 67058146               | C/T     | 1.74E-05 | 1.475      | 0.2243       | 0.1647            | <i>LOC644838</i> |
| 2    | rs17035931 | 47035536               | C/A     | 2.21E-05 | 0.6651     | 0.1866       | 0.2487            | <i>TTC7A</i>     |
| 4    | rs12643648 | 79543504               | T/G     | 2.23E-05 | 0.6751     | 0.1981       | 0.2604            | <i>FRAS1</i>     |
| 22   | rs9306489  | 43904148               | G/A     | 2.34E-05 | 1.392      | 0.3742       | 0.3008            | <i>NUP50</i>     |
| 2    | rs17415659 | 1476810                | T/C     | 2.48E-05 | 0.7149     | 0.3008       | 0.3739            | <i>TPO</i>       |
| 2    | rs4663163  | 235290899              | A/G     | 2.76E-05 | 1.377      | 0.4088       | 0.3369            | <i>ARL4C</i>     |
| 13   | rs9549067  | 39600657               | A/G     | 2.99E-05 | 1.415      | 0.3155       | 0.2459            | <i>LOC646953</i> |
| 4    | rs13116982 | 189273316              | G/A     | 3.13E-05 | 1.589      | 0.1405       | 0.09379           | <i>TRIML2</i>    |
| 2    | rs4927594  | 1504565                | C/T     | 3.32E-05 | 1.363      | 0.5335       | 0.4601            | <i>TPO</i>       |
| 8    | rs2049833  | 15711171               | G/A     | 3.42E-05 | 1.581      | 0.1447       | 0.09849           | <i>TUSC3</i>     |
| 20   | rs2210455  | 9867383                | T/G     | 3.70E-05 | 0.6735     | 0.1783       | 0.2391            | <i>ANKRD5</i>    |
| 3    | rs10513580 | 163422601              | C/T     | 4.38E-05 | 1.537      | 0.1604       | 0.1094            | <i>LOC131149</i> |
| 5    | rs10043664 | 54464067               | A/C     | 4.59E-05 | 0.6212     | 0.1059       | 0.1603            | <i>CDC20B</i>    |
| 1    | rs12143304 | 86278343               | G/A     | 4.78E-05 | 1.487      | 0.196        | 0.1402            | <i>COL24A1</i>   |
| 16   | rs1947261  | 58964075               | G/A     | 5.02E-05 | 1.353      | 0.5189       | 0.4412            | <i>LOC729159</i> |

**Supplementary Table 4:** Association analysis of UK depression females cases (n=1152) against all controls (n=1594), using logistic regression with two covariates of ancestry principal components. Genomic control  $\lambda=1.02$

| Chr. | SNP        | Position in base pairs | Alleles | P-value  | Odds Ratio | Frequency in |                   | Closest gene     |
|------|------------|------------------------|---------|----------|------------|--------------|-------------------|------------------|
|      |            |                        |         |          |            | Cases        | Screened controls |                  |
| 10   | rs9416742  | 60212700               | A/G     | 1.82E-08 | 0.6729     | 0.1762       | 0.2346            | <i>BICC1</i>     |
| 10   | rs999845   | 60205926               | T/C     | 3.80E-08 | 0.6801     | 0.1785       | 0.2358            | <i>BICC1</i>     |
| 8    | rs987390   | 86734603               | G/A     | 1.58E-06 | 0.7656     | 0.4362       | 0.5016            | <i>REXO1L1</i>   |
| 17   | rs8067196  | 49822630               | C/A     | 2.26E-06 | 1.6        | 0.1033       | 0.06838           | <i>TOM1L1</i>    |
| 8    | rs2930553  | 86918262               | G/T     | 2.48E-06 | 0.7694     | 0.4609       | 0.5254            | <i>REXO1L1</i>   |
| 3    | rs13079811 | 82697593               | C/A     | 2.69E-06 | 0.7572     | 0.3082       | 0.3714            | <i>GBE1</i>      |
| 17   | rs8066010  | 49808584               | A/G     | 2.77E-06 | 1.594      | 0.1033       | 0.06864           | <i>TOM1L1</i>    |
| 1    | rs606149   | 192188171              | T/C     | 5.05E-06 | 1.288      | 0.4952       | 0.4307            | <i>LOC647167</i> |
| 1    | rs10921464 | 192156156              | T/C     | 6.68E-06 | 0.7767     | 0.3901       | 0.4551            | <i>LOC647167</i> |
| 3    | rs7433760  | 187284322              | G/A     | 8.12E-06 | 0.7606     | 0.2695       | 0.3262            | <i>ETV5</i>      |
| 20   | rs2423618  | 11757442               | C/T     | 1.59E-05 | 1.295      | 0.3455       | 0.2889            | <i>LOC728450</i> |
| 5    | rs2359879  | 76841025               | A/C     | 2.12E-05 | 1.511      | 0.1076       | 0.0756            | <i>WDR41</i>     |
| 3    | rs2731943  | 21355681               | T/C     | 2.63E-05 | 1.307      | T/C          | 2.63E-05          | <i>VENTXP7</i>   |
| 17   | rs1547966  | 51779870               | C/T     | 2.70E-05 | 1.301      | C/T          | 2.70E-05          | <i>ANKFN1</i>    |
| 6    | rs10806179 | 80584274               | C/A     | 2.75E-05 | 0.7659     | C/A          | 2.75E-05          | <i>ELOVL4</i>    |
| 16   | rs4257224  | 7335293                | G/T     | 2.76E-05 | 1.46       | G/T          | 2.76E-05          | <i>A2BP1</i>     |
| 10   | rs10763492 | 58952986               | G/A     | 2.86E-05 | 0.7456     | G/A          | 2.86E-05          | <i>IPMK</i>      |
| 17   | rs9944407  | 40017486               | C/T     | 2.89E-05 | 0.7863     | C/T          | 2.89E-05          | <i>FZD2</i>      |
| 18   | rs4891441  | 62222556               | C/A     | 2.94E-05 | 0.7485     | C/A          | 2.94E-05          | <i>CDH19</i>     |
| 5    | rs10512971 | 51897194               | G/A     | 3.34E-05 | 0.76       | G/A          | 3.34E-05          | <i>PELO</i>      |
