# Supplementary material for: Genome-Wide Association Study of Major Recurrent Depression in the U.K. Population
Source: Atypon-hosted journal article supplement (doi:10.1176/appi.ajp.2010.09091380), 2010-06-02

# Supplementary Figure 5.

## Protein domain structure of BICC1 isoforms

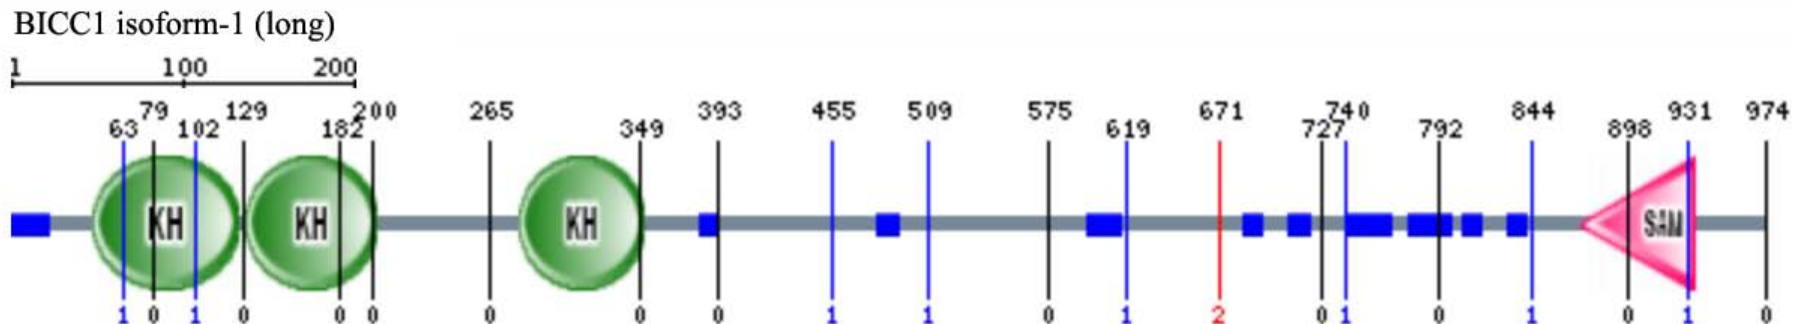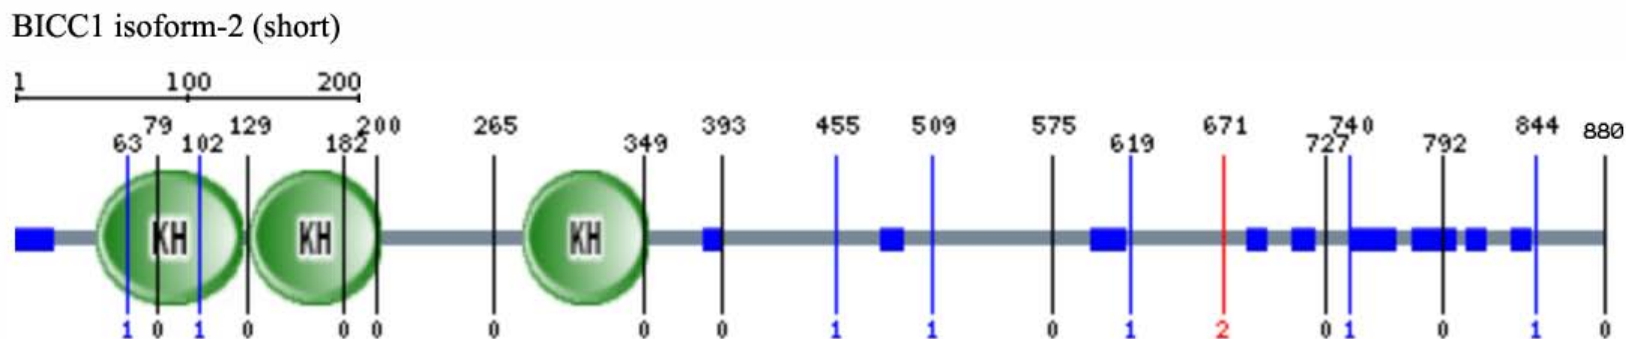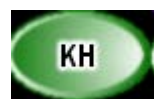

K homology  
RNA-binding domain

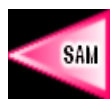

Sterile alpha motif  
(SAM) domain

■ Disordered region

Intron positions are indicated with vertical lines showing the intron phase and AA position.

# Supplementary Figure 6a.

## BICC1 isoform-1 expression in normal human tissues (213429\_at)

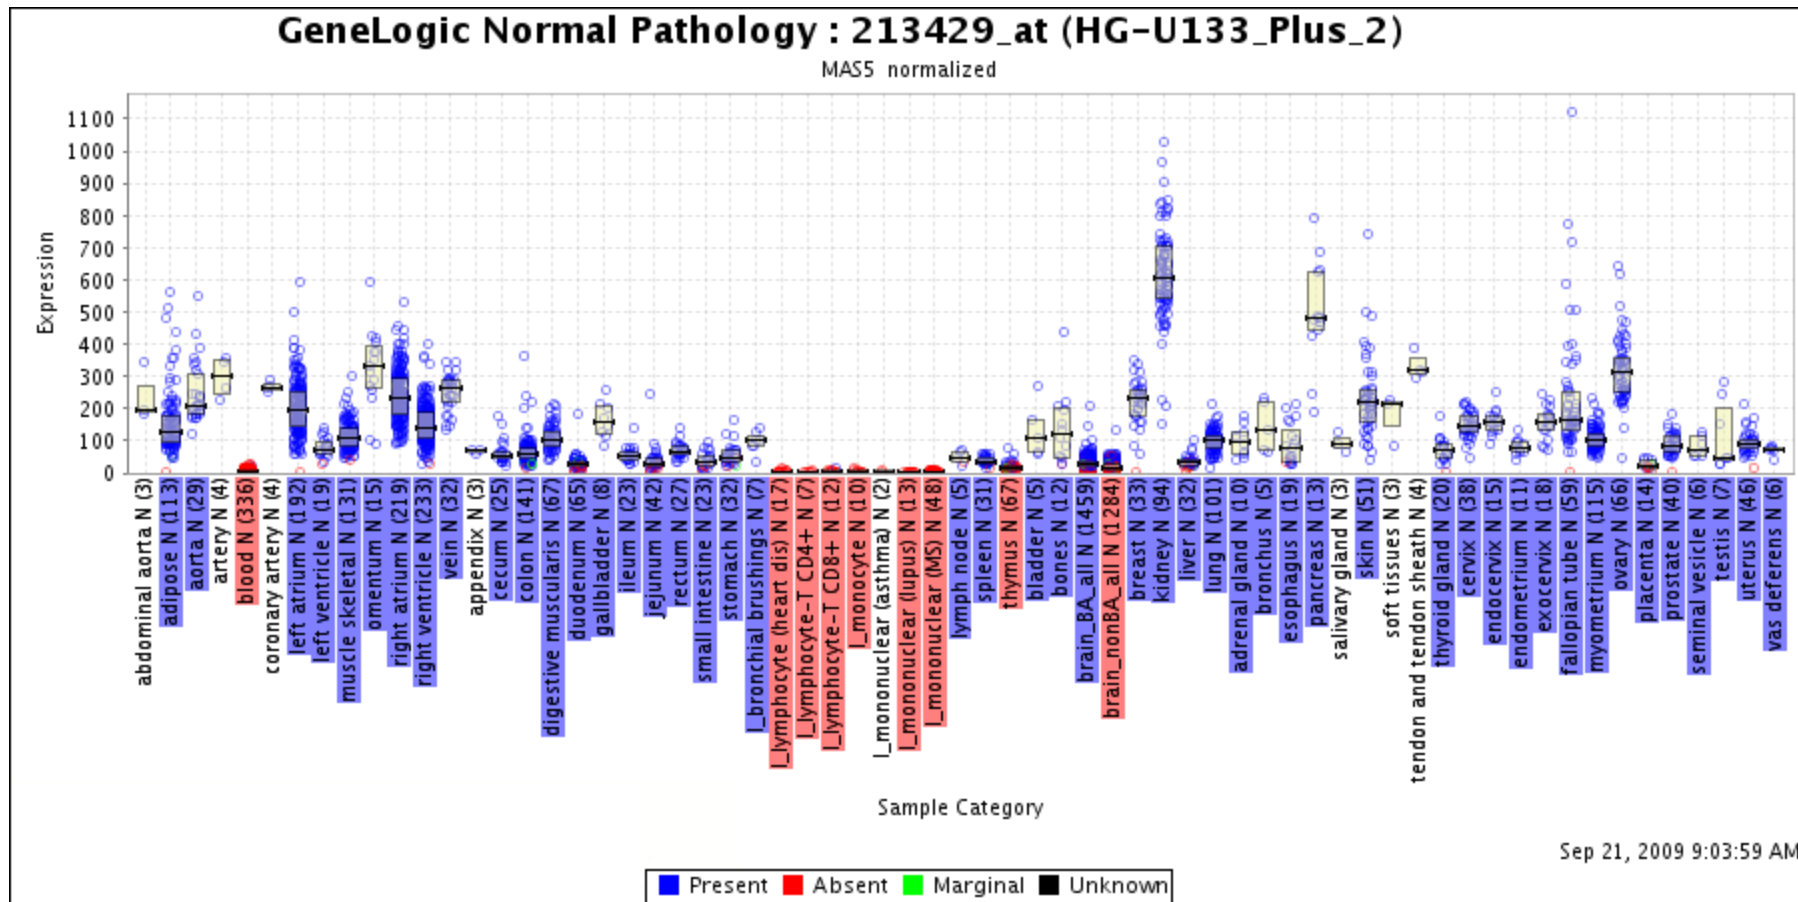

# Supplementary Figure 6b.

BICC1 isoform-2 expression in normal human tissues (220580\_at)

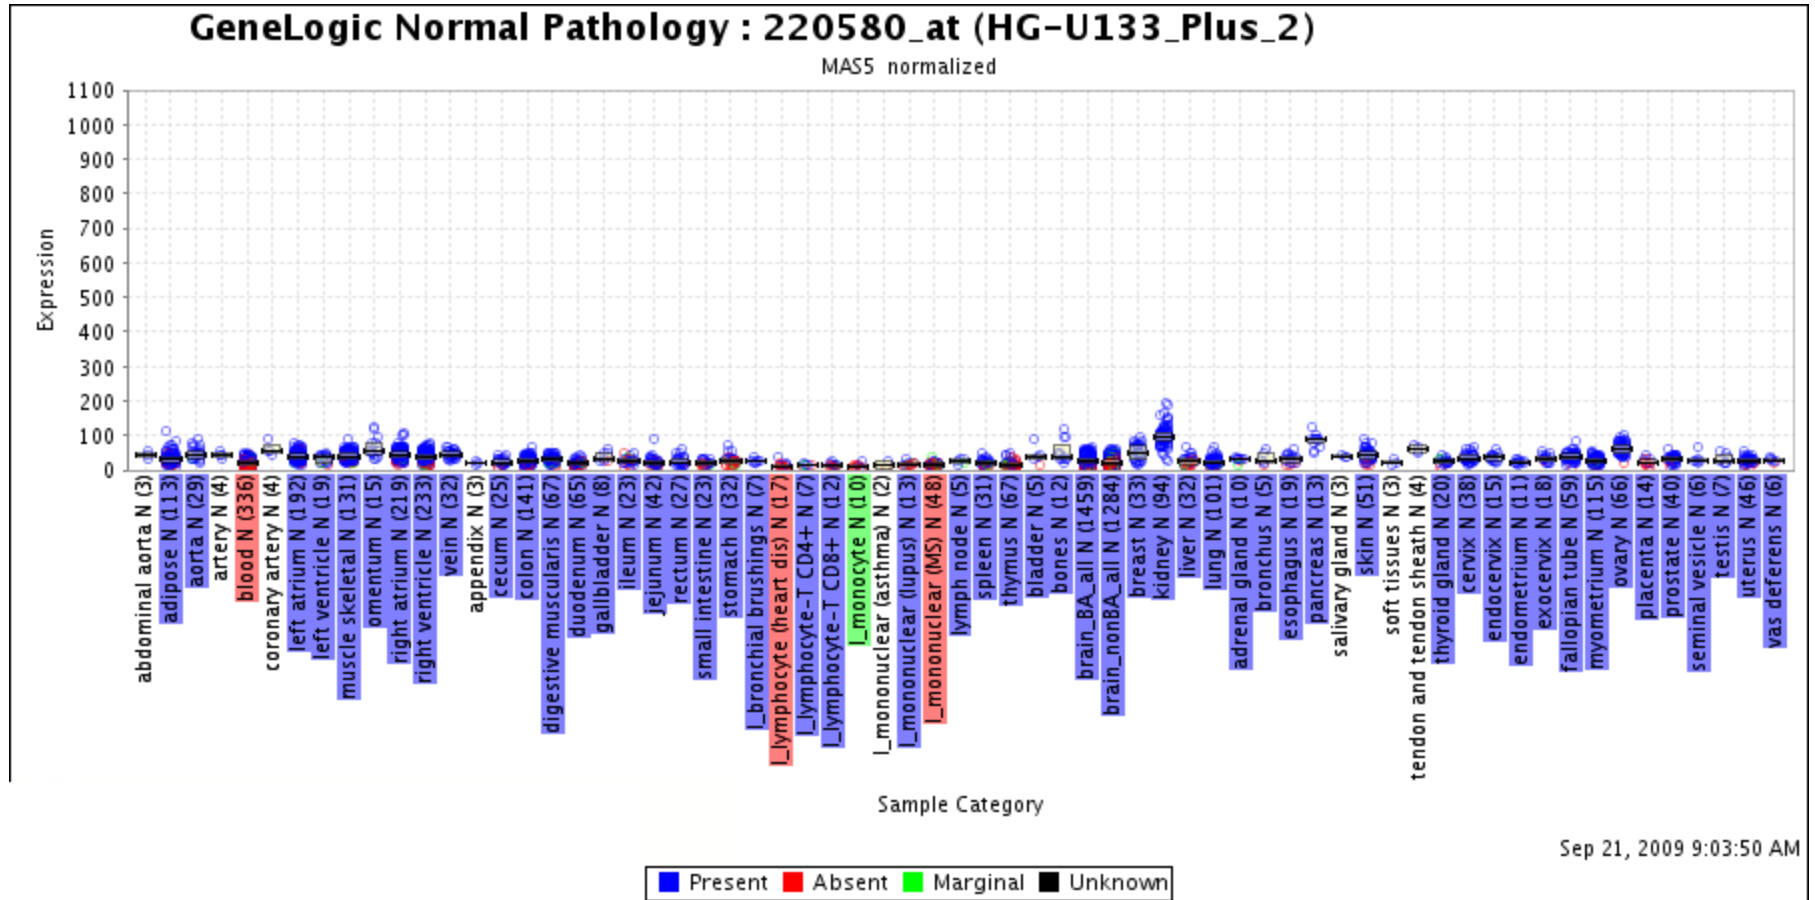

# Supplementary Figure 6c.

BICC1 isoform-1 expression in normal human brain and nerve tissues (213429\_at)

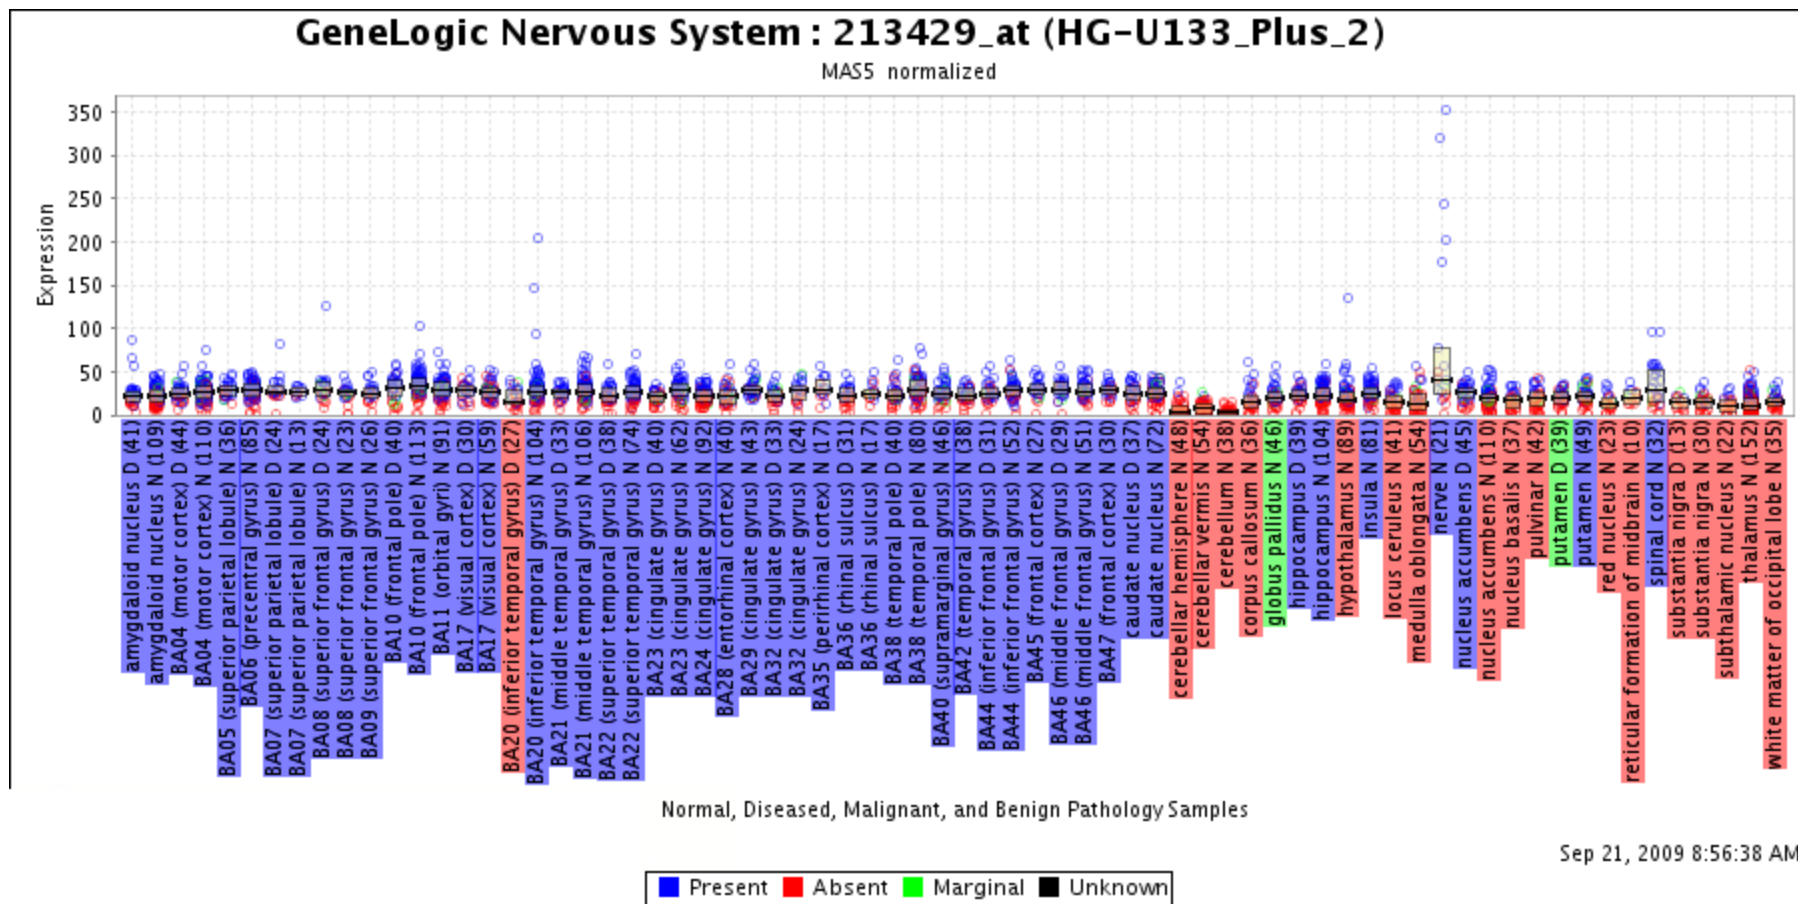

# Supplementary Figure 6d.

BICC1 isoform-2 expression in normal human brain and nerve tissue (220580\_at)

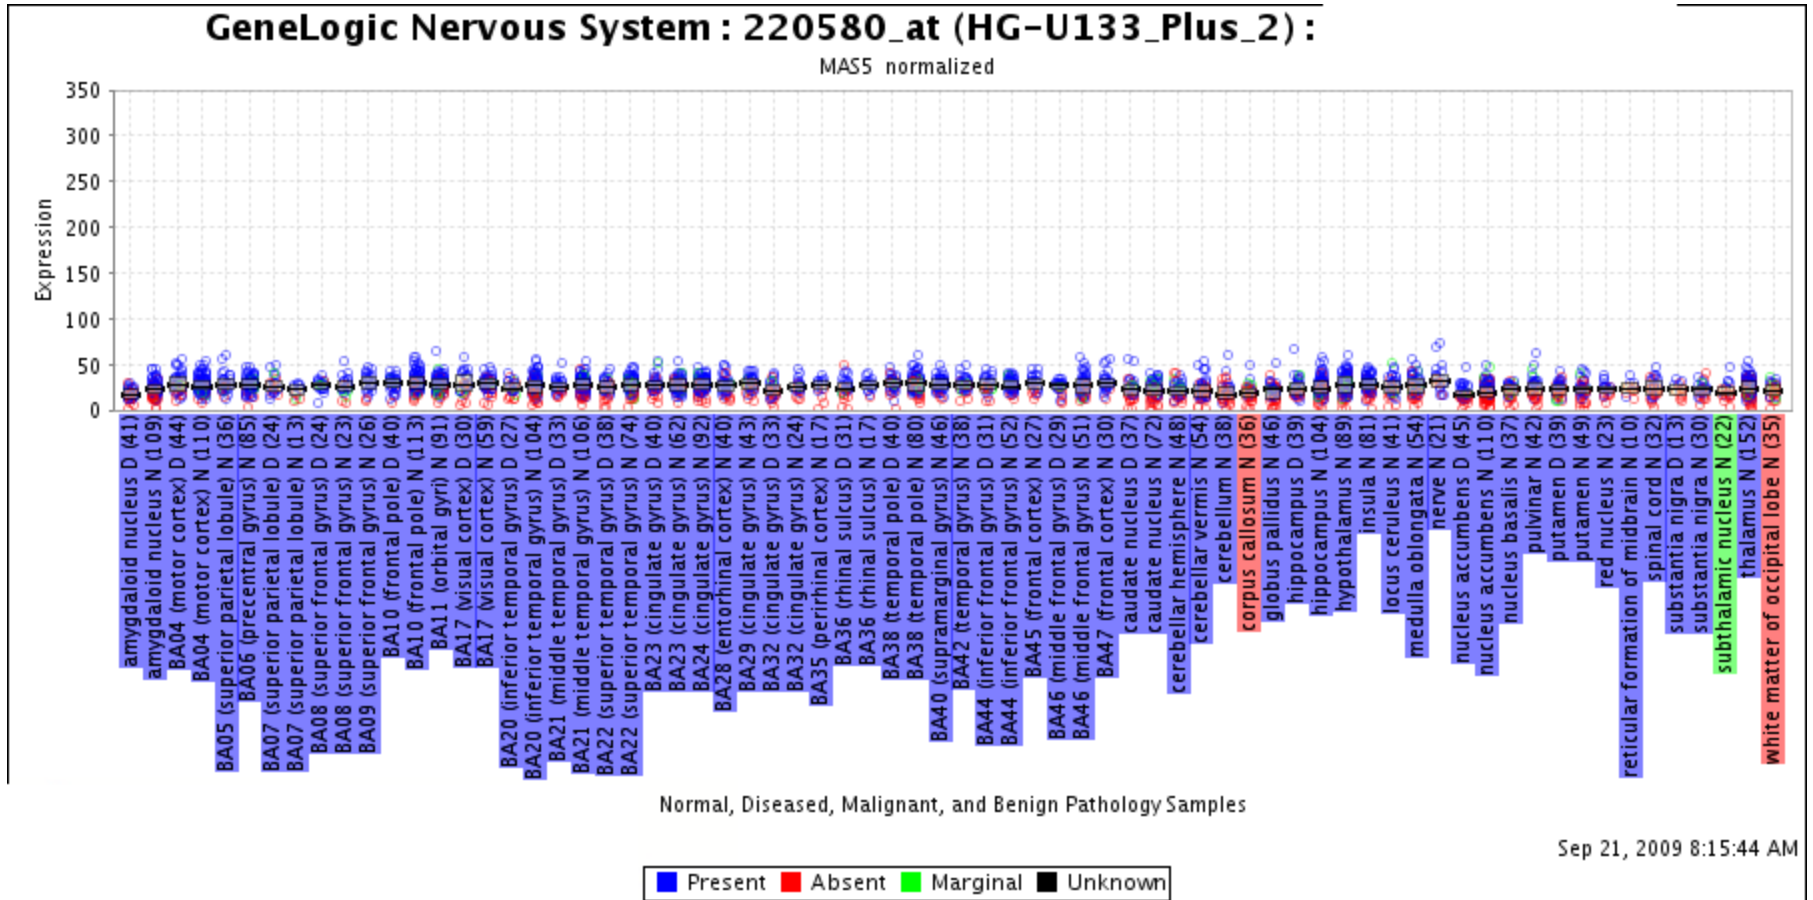

Supplement: ajp_167_08_949_02.pdf [file ajp_167_08_949_02.pdf]
